# Supplementary material for: Synergistic cooperation promotes multicellular performance and unicellular free-rider persistence
Source: PubMed Central journal article supplement (PMC5465372; doi:10.1038/ncomms15707), 2017-06-05
Supplement: ncomms15707-s1.pdf [file ncomms15707-s1.pdf]

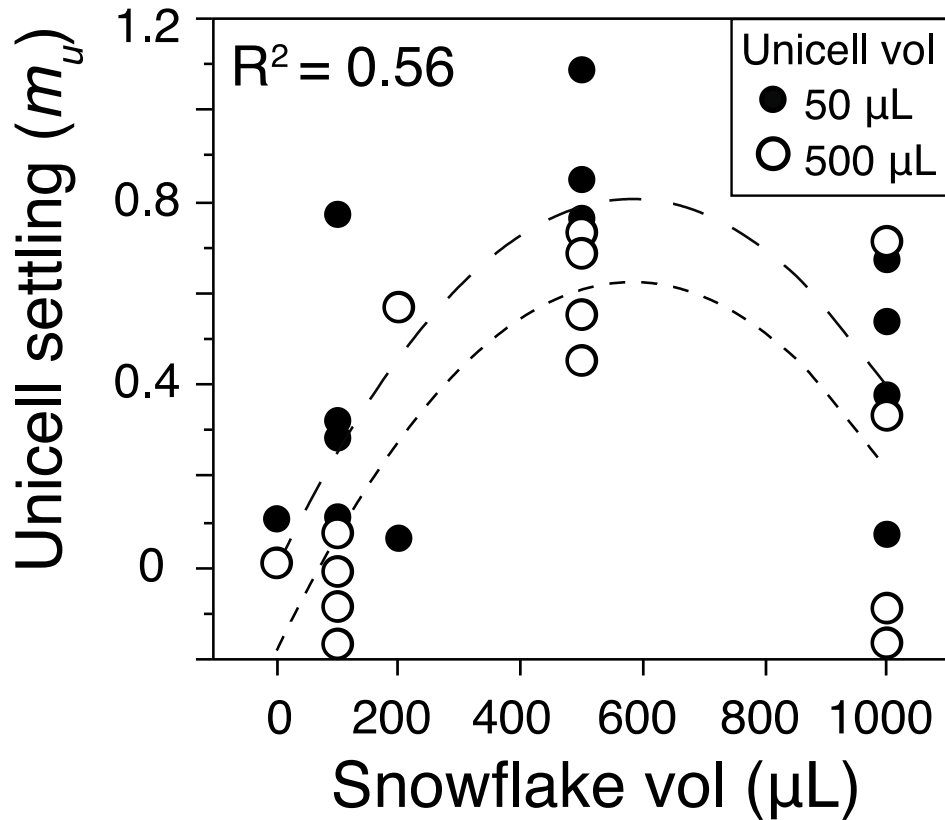

**Supplementary Figure 1.** Unicell settling depends on snowflake abundance. The benefit to unicells initially increases with snowflake abundance (least-squares regression, linear term:  $p < 0.0001$ ) but declines for high snowflake densities (quadratic term:  $p < 0.0001$ ). In contrast, increased unicell density during settling did not increase unicell settling, but rather marginally reduced unicell settling ( $p = 0.051$ ). Dashed lines show predicted unicell enrichment for low (coarse) and high (fine) unicell additions according to the model  $m_U = m_U(0) + V(U) + V(SF) + V(SF)^2$ , where  $V$  is volume,  $U$  denotes unicell,  $SF$  is snowflake, and  $m_U(0)$  is the y-intercept. Model parameters were estimated by ordinary least-squares regression. See Supplementary Data 4 for raw data and complete results of the regression analysis.

## Settling in Floc+ (dextrose) vs Floc- (galactose)

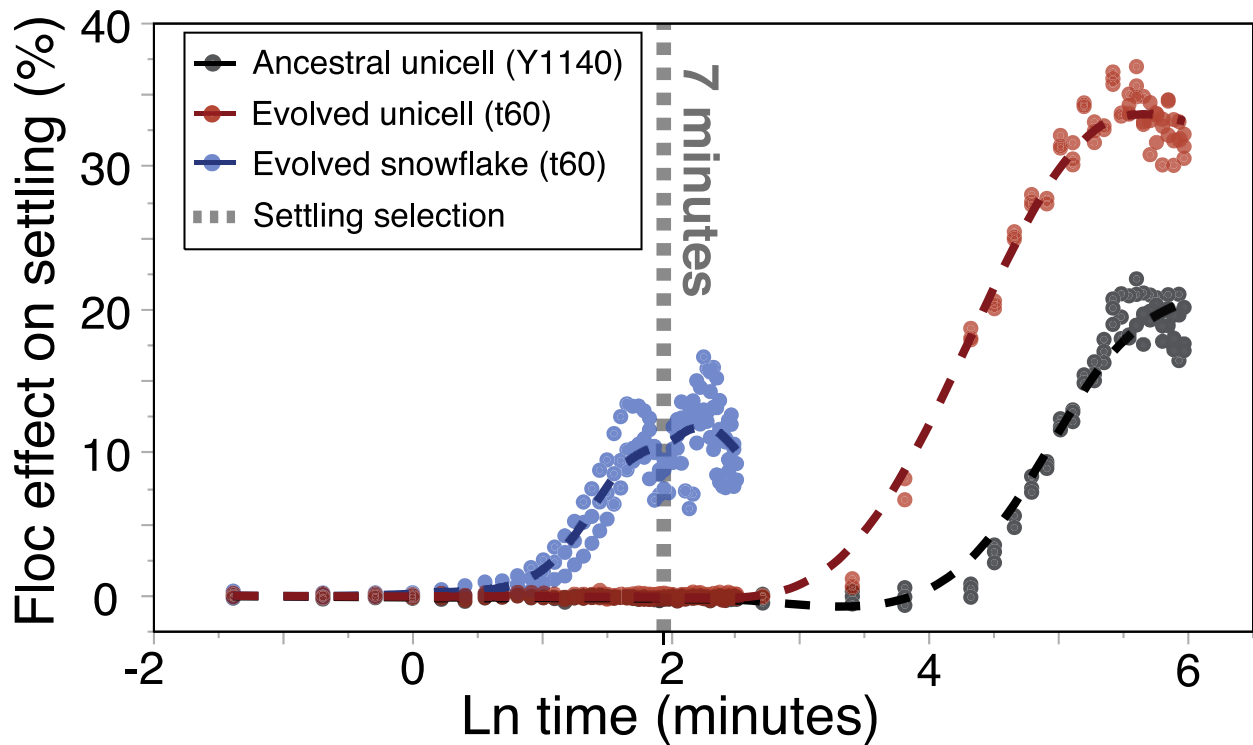

**Supplementary Figure 2.** Floc positively effects settling in both multicellular and unicellular strains, including the ostensibly non-flocculent ancestor Y-1140. Flocculation accelerates settling over a period relevant to selection (7 minutes) in snowflake cultures (Tukey's HSD:  $p < 0.0001$ ), whereas there is no significant difference between unicell cultures settled under low- or high-flocculation conditions ( $p = 0.999$ ; Supplementary Data 6). However, during extended settling (6.5 hours), evolved unicells settle more rapidly than the ancestor in high-flocculation cultures (Tukey's HSD:  $p = 0.0036$ ), yet there was no significant difference between ancestral and evolved unicells when flocculation was disrupted ( $p = 0.51$ ). Floc effect on settling was quantified as the difference in percent reduction in culture turbidity between high- and low-flocculation conditions. Note that time is in  $\log(\text{minutes})$  in order to allow visual comparisons of strains with dramatically different settling rates.
